# Supplementary material for: Characterization of SHCBP1 to prognosis and immunological landscape in pan-cancer: novel insights to biomarker and therapeutic targets
Source: publisher site journal article supplement (doi:10.18632/aging.204591), 2023-03-14
Supplement: Supplementary file [file aging-v15i6-204591-supplementary-material-SD1.pdf]

SUPPLEMENTARY FIGURE

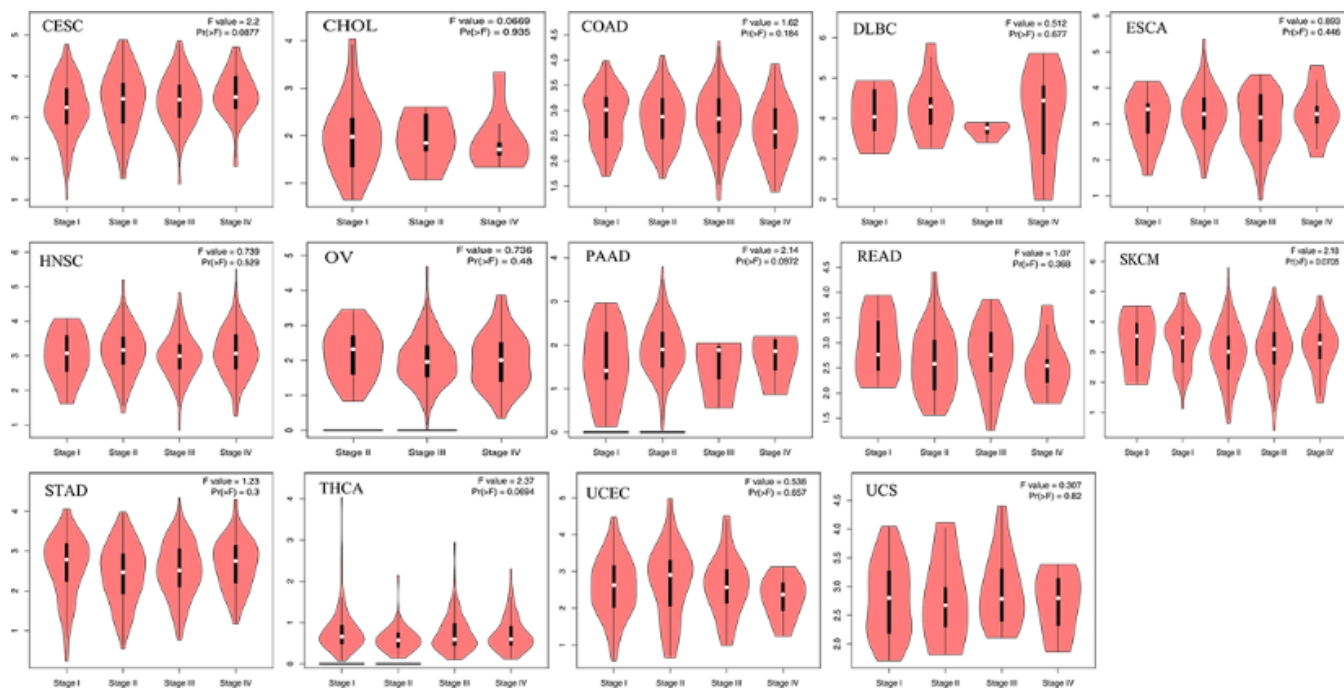

Supplementary Figure 1. The association between SHCBP1 expression and pathological stages in other cancers of GEPIA database.
